# Supplementary material for: Co-Creation With TickiT: Designing and Evaluating a Clinical eHealth Platform for Youth
Source: PubMed Central journal article supplement (PMC3806391; doi:10.2196/resprot.2865), 2013-10-18
Supplement: resprot_v2i2e42_app2.pdf [file resprot_v2i2e42_app2.pdf]

# TickiT for Health

## Features Overview

Daniel Penn  
daniel@tickitforhealth.com

Shift Health Paradigms© 2011  
TickiT for Health™

The logo for TickiT, featuring the word "TickiT" in a white, bold, sans-serif font. The letters "i" and "i" are lowercase, while "T", "c", "k", "T" are uppercase. The logo is set against a blue speech bubble background that has a tail pointing downwards and to the left.

TickiT

**Here's an overview of TickiT's features in three domains:**

**Survey & Feedback  
Tool Features**

page 3

**Website  
Features**

page 9

**TickiT  
Services**

page 13

# Survey Features

# Interactive Survey Templates

We've got lots of templates for you to choose from when developing your survey, from graphic buttons to sliders for scales, scrollers for numbers, and more.

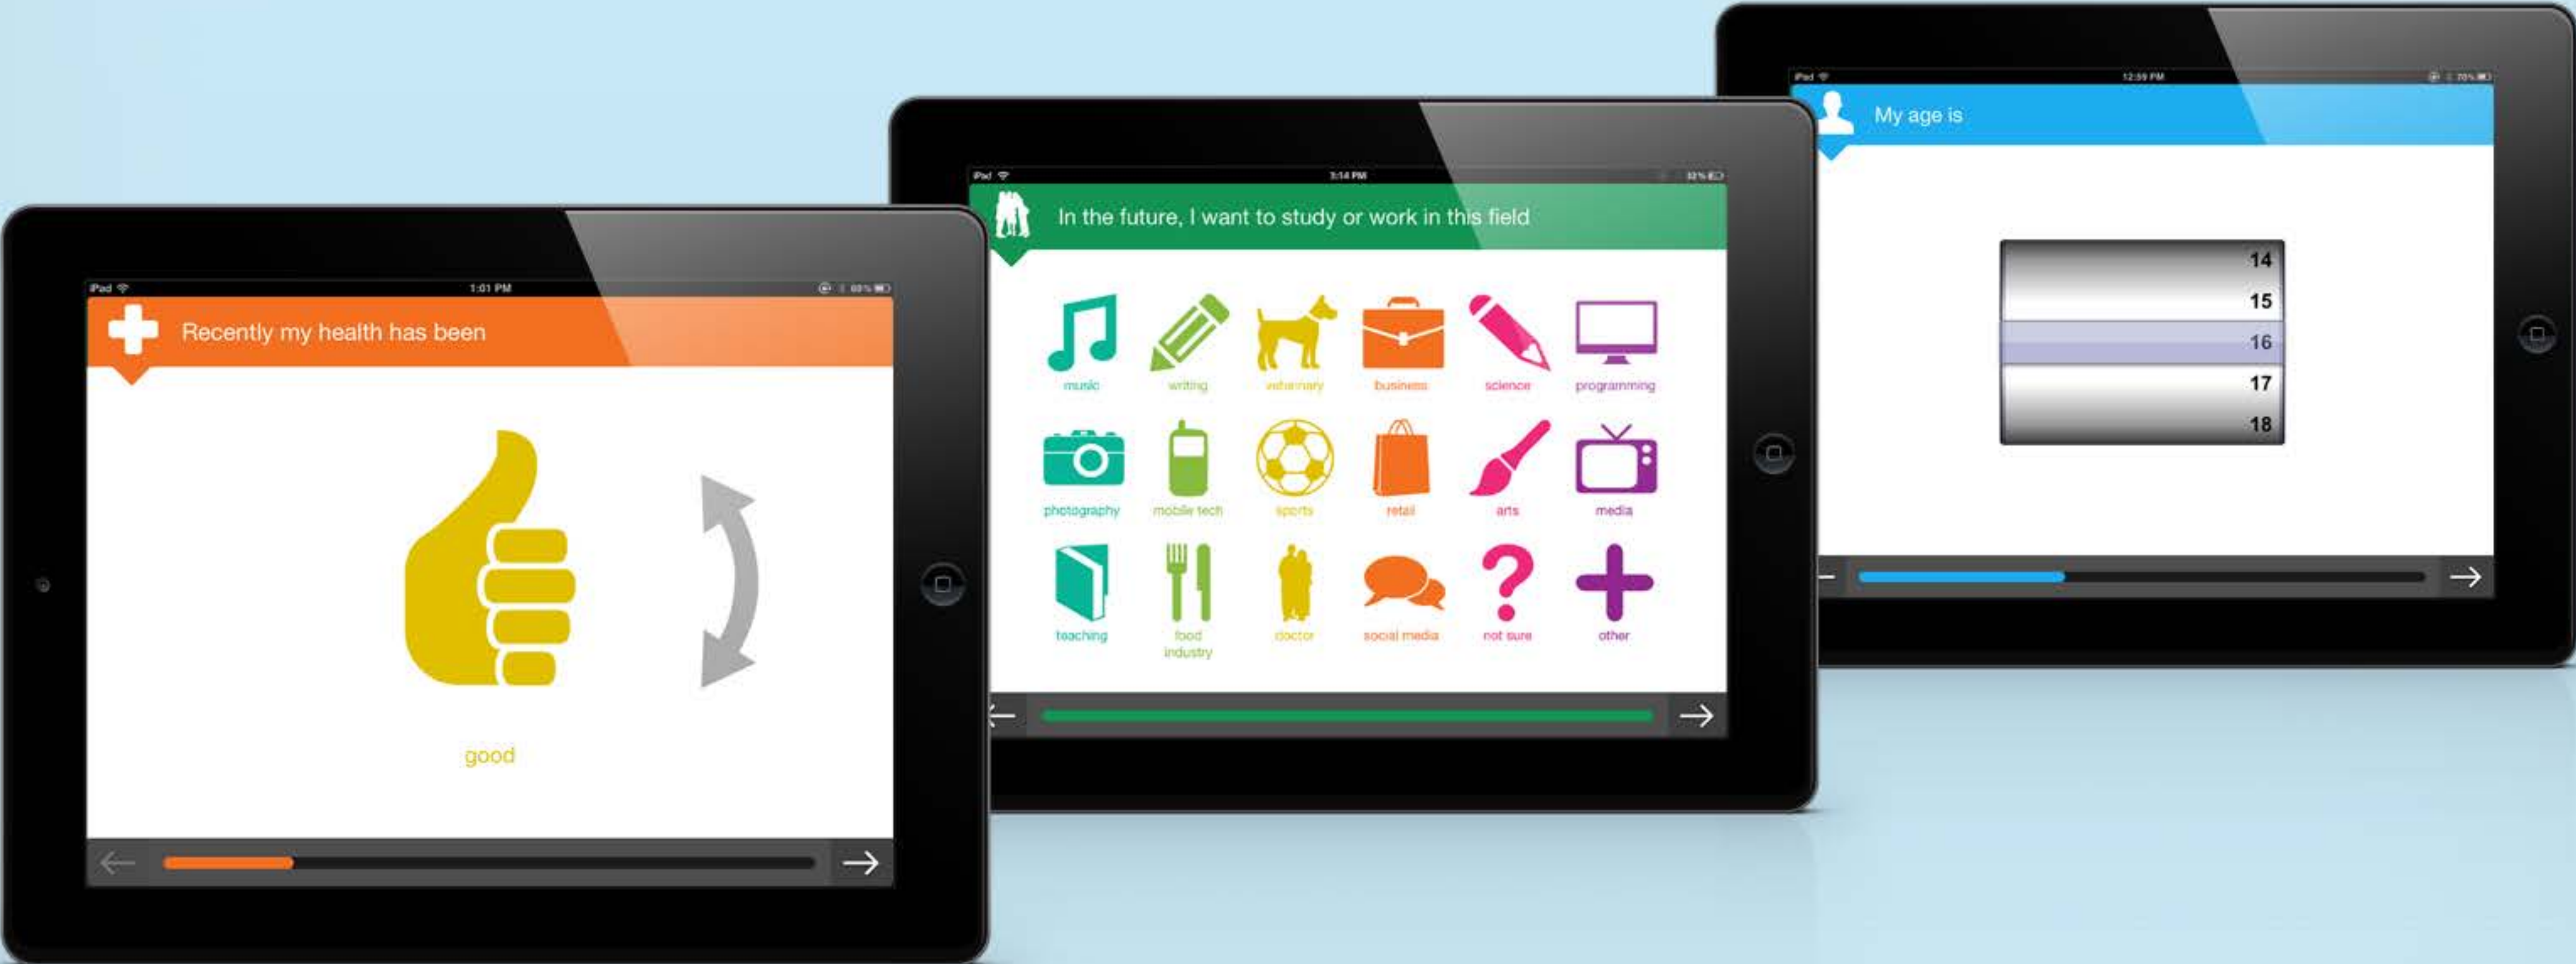

# Educational Patient Feedback

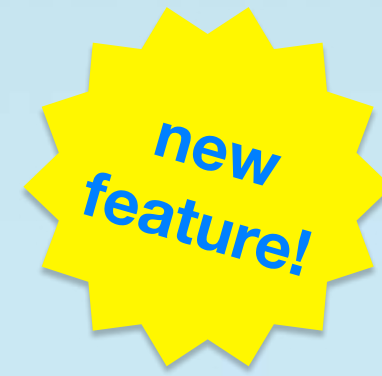

After patients fill out your survey, our system dynamically provides them with educational feedback based on their responses. Provide stats, comparison graphs, and lifestyle suggestions to help educate your patients with tailored information.

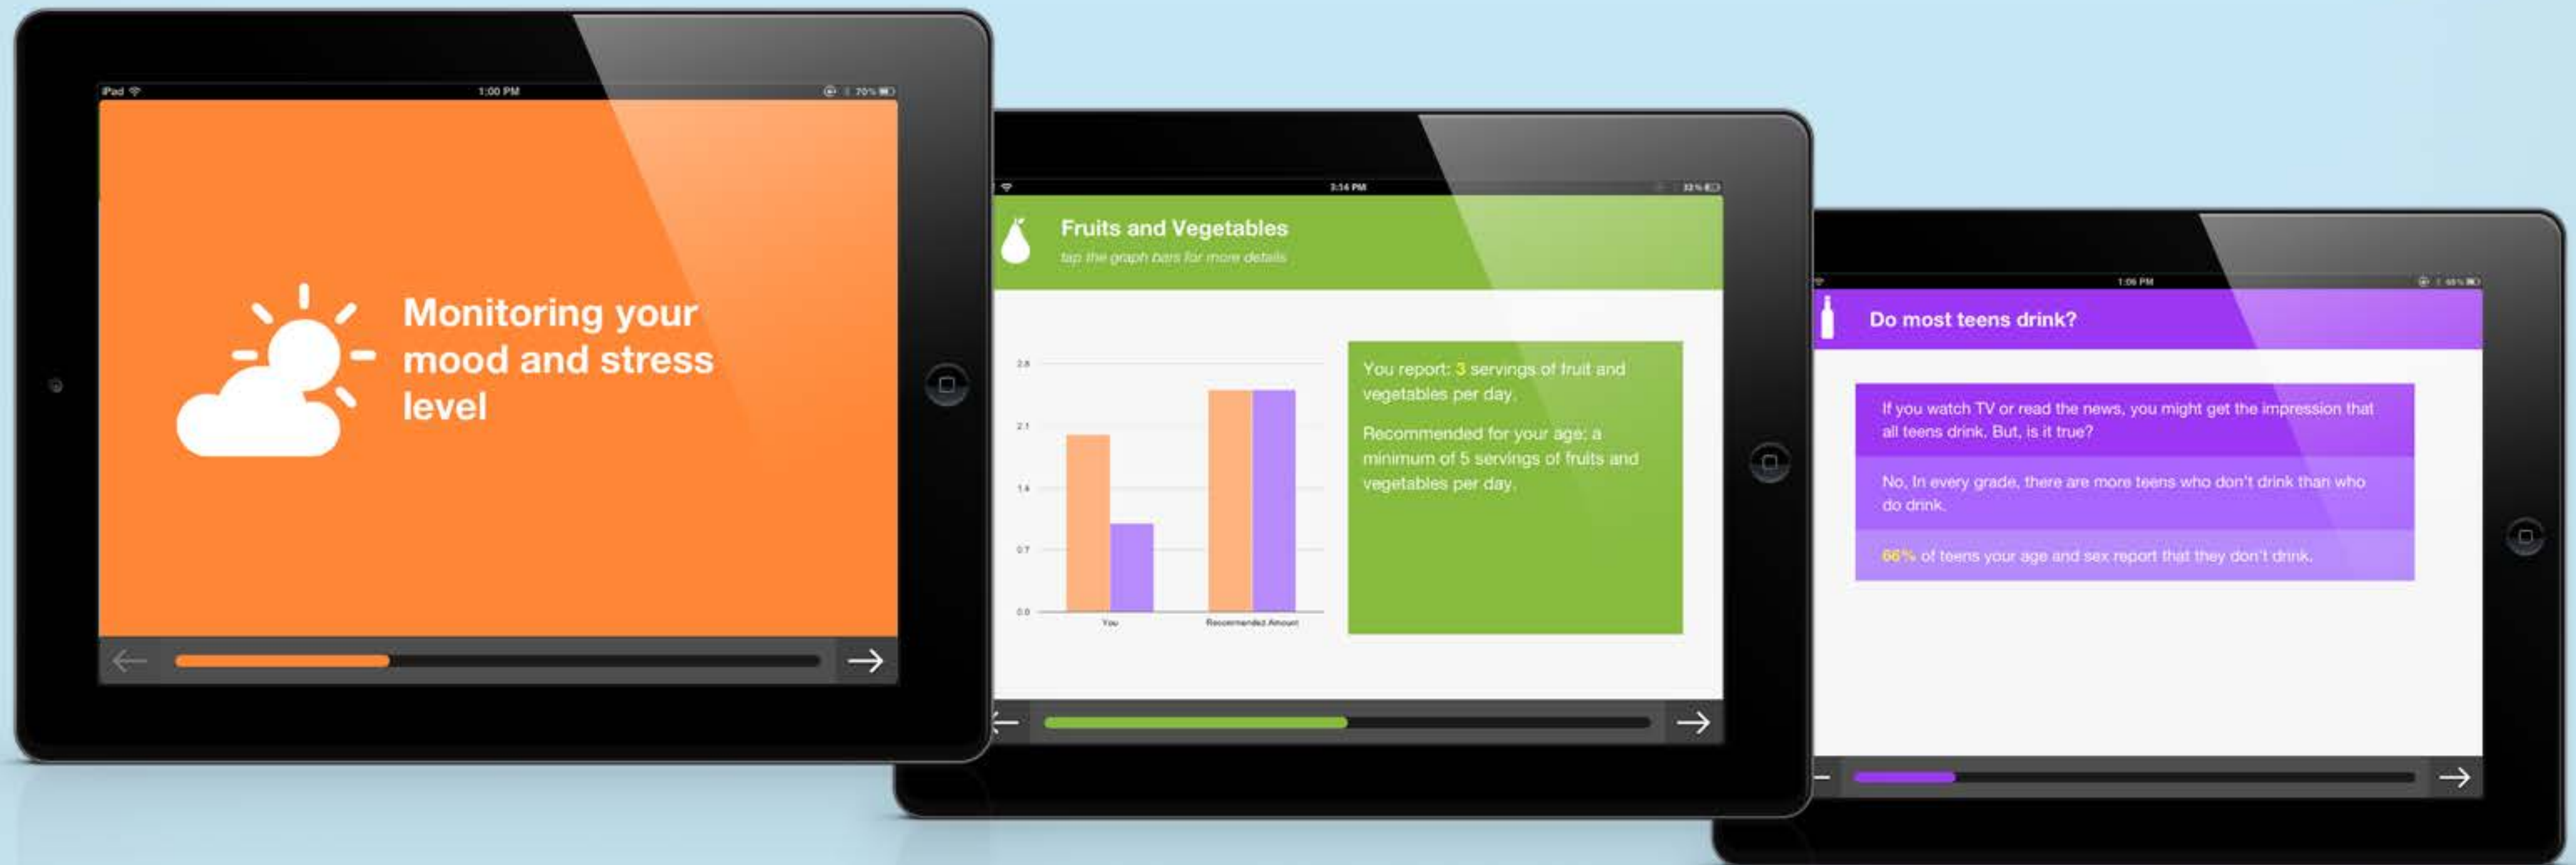

## Large Library of Icons

We've got over 200 graphic icons for your patients to engage with - and our library is constantly growing! TickiT gives you access to our entire library and can develop custom icons to meet your needs.

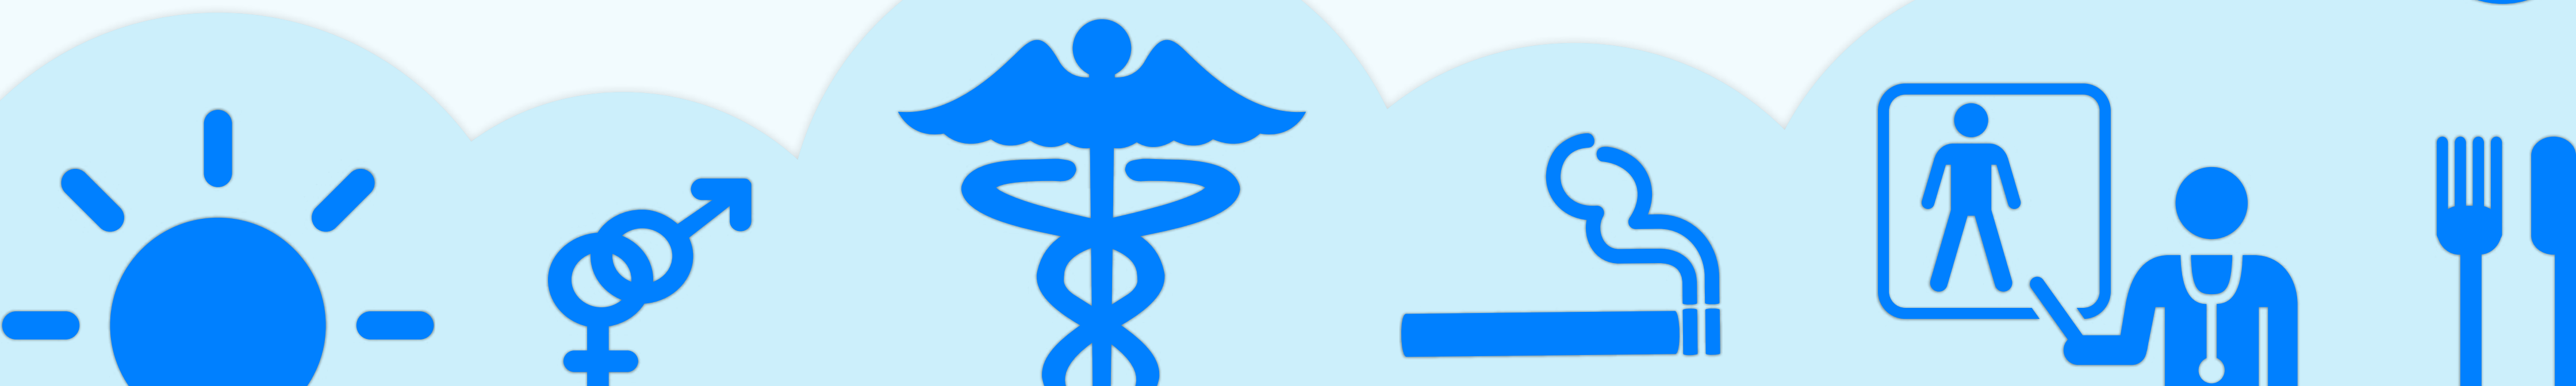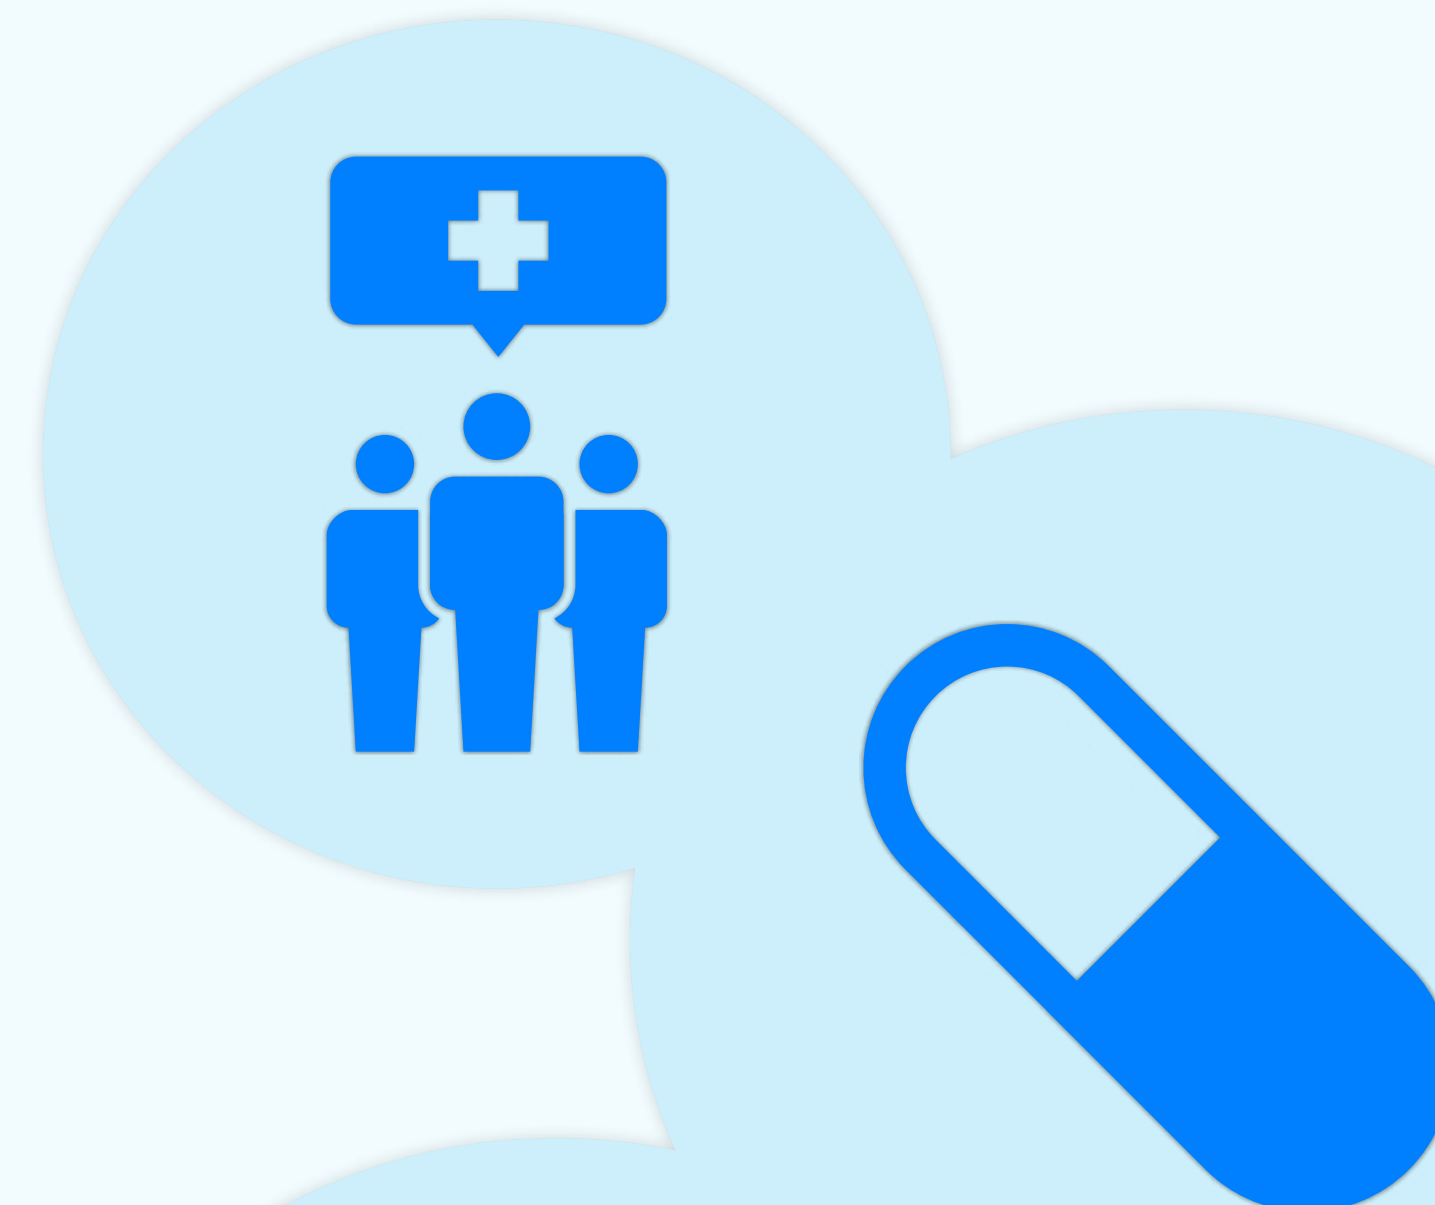

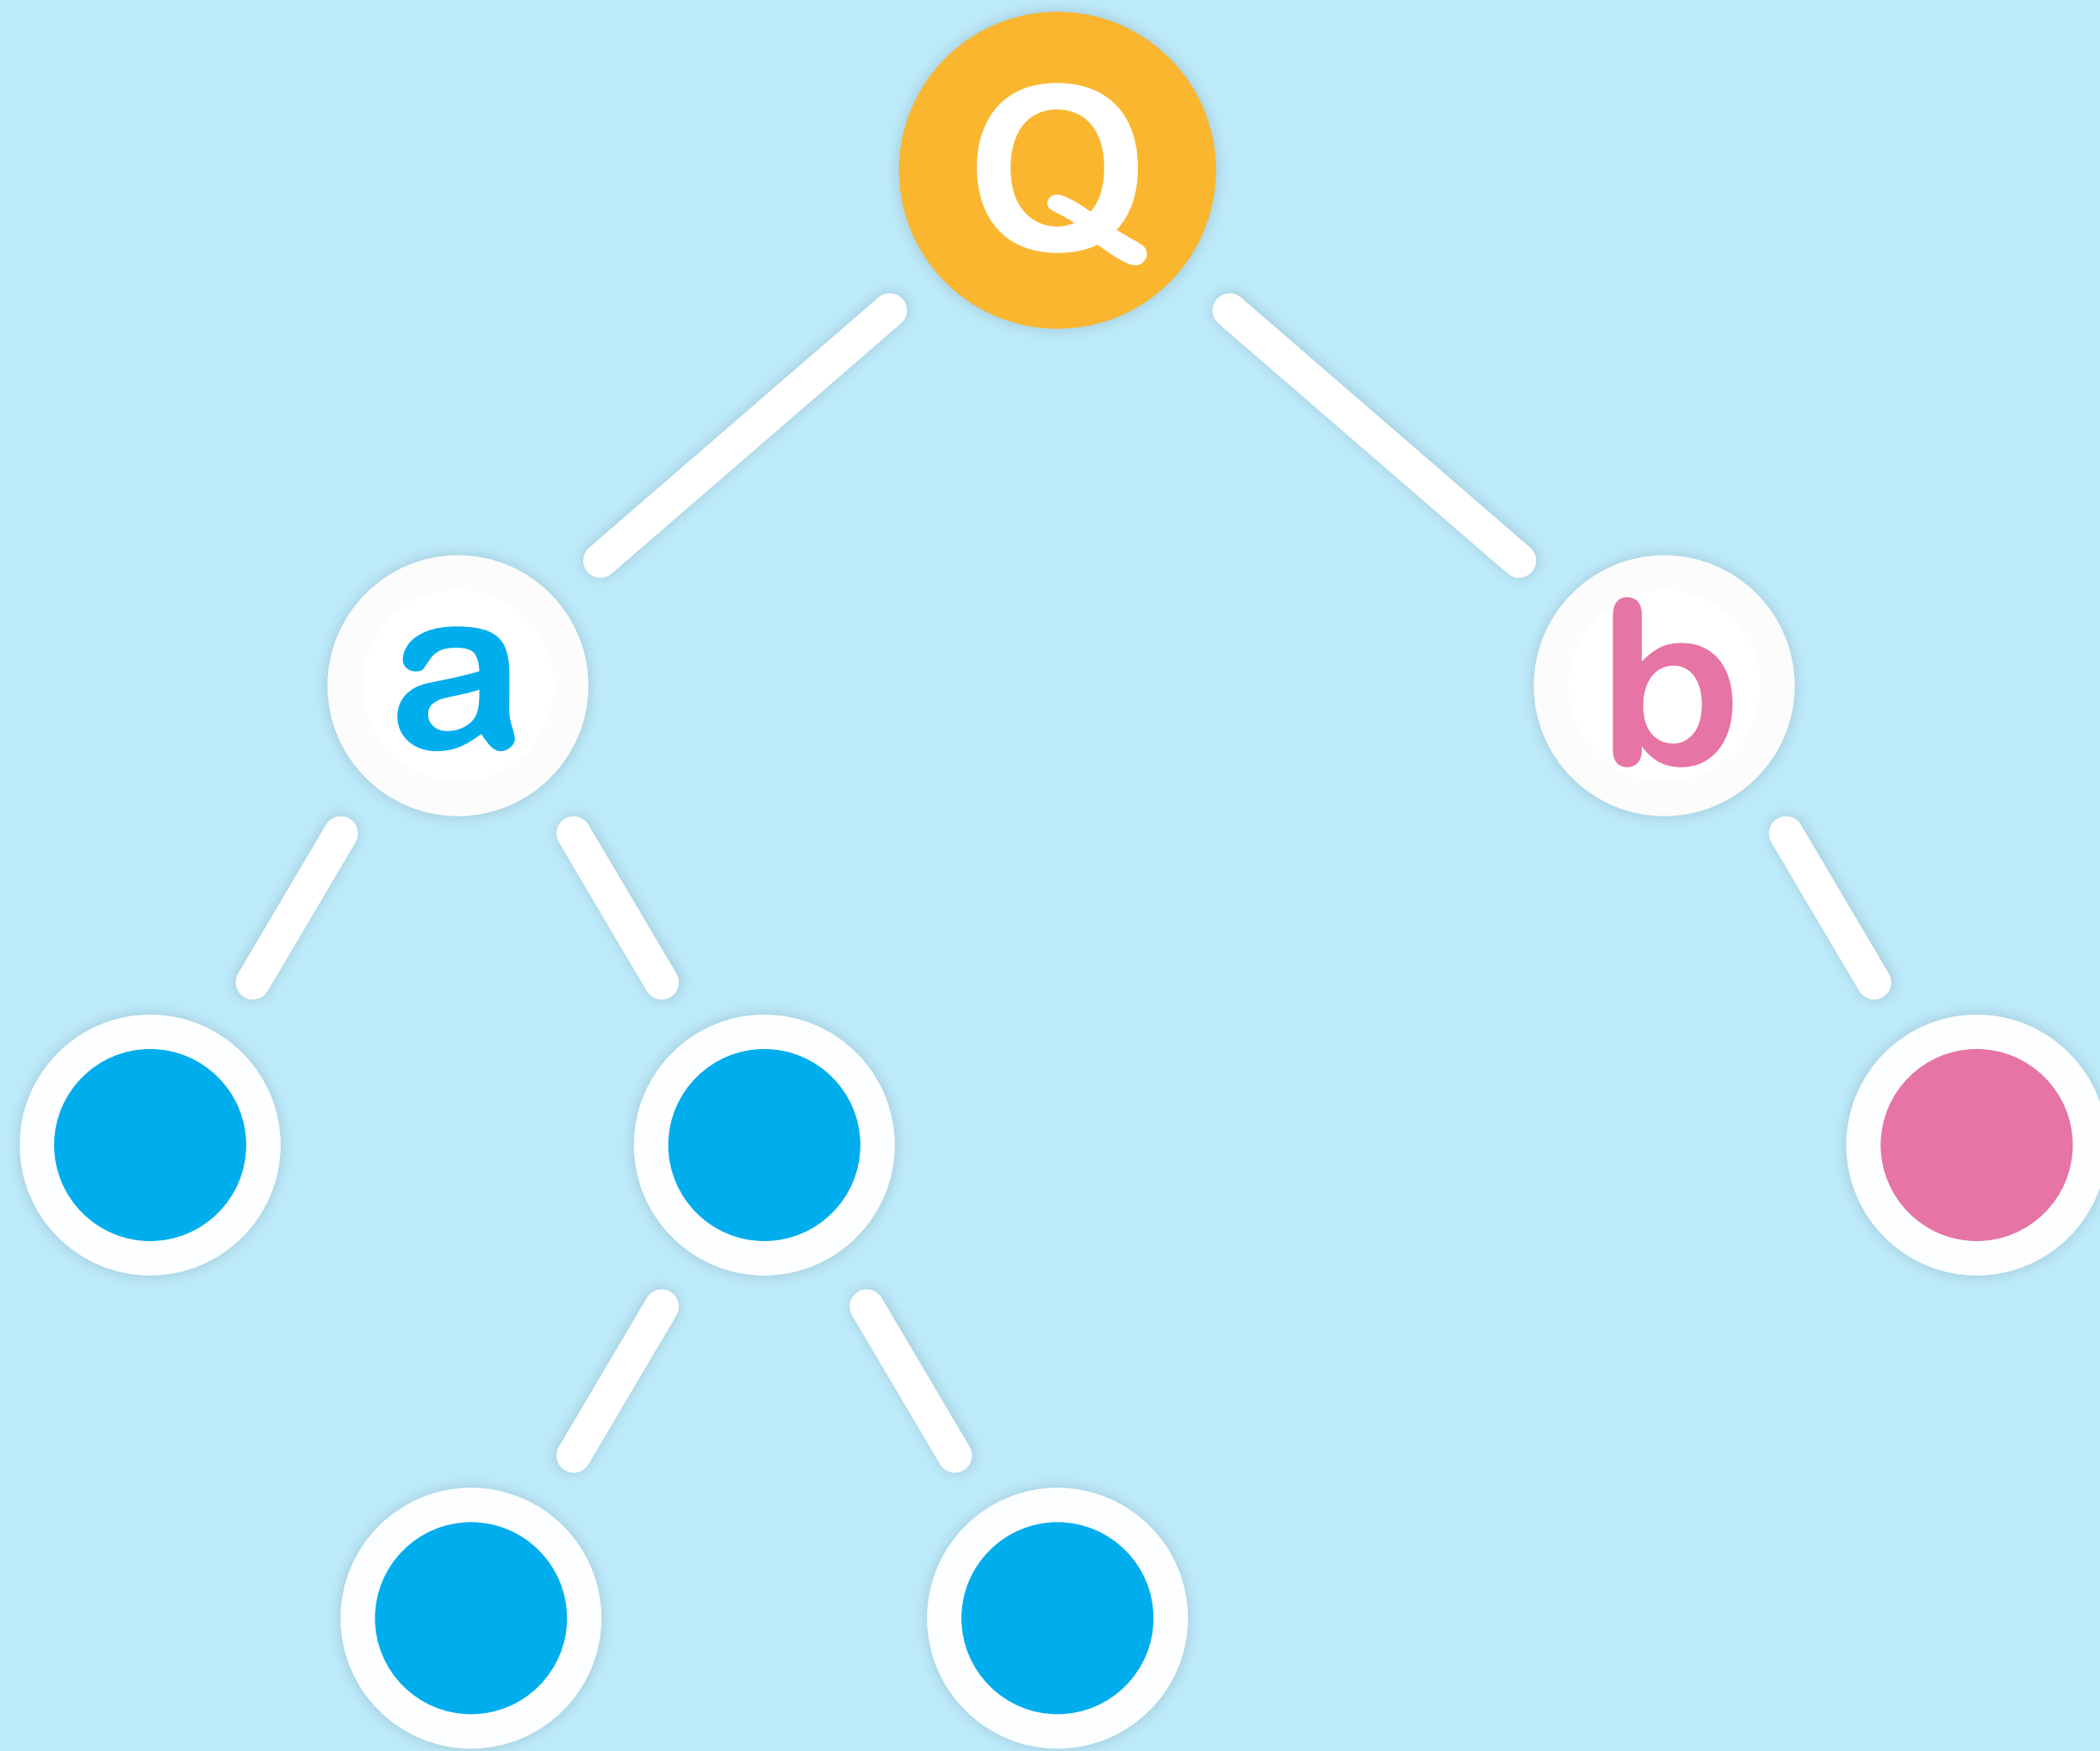

## Branching To The Right Questions

Branching ensures patients only get asked relevant questions based on their previous answers. This can divide surveys by language, varying age groups, and specific topics.

## Multiple Language Support

Have a varied patient population? Ask questions in multiple languages and receive responses in English.

TickiT offers the HEADSS survey in French. We can also build your custom survey in multiple languages.

*hello*

*bonjour*

*hola*

*ciao*



# Website Features

TickiT Health Professional Logged in as Stephanie Logout

NA Neurology Reports Help Feedback Settings

Reports / Last 7 Days / Review 2 Orange Alerts 3 Red Alert

Check All Load Default Save Default Print PDF Request Consent Revocation

## HEADSS

Patient ID: 8521 Date: 04/30/2013 at 13:06

| Survey Question                                          | Patient Response       |   |
|----------------------------------------------------------|------------------------|---|
| <b>ALERTS</b>                                            |                        |   |
| I handle my worries well                                 | never                  | ✗ |
| I identify as                                            | not sure               | ✗ |
| I have tried to harm myself                              | man times              | ✗ |
| I can talk to someone in my family if I have problems    | yes, about most things | ✓ |
| I participate in a sports team, club, or organized group | once or twice a week   | ✓ |
| I think my weight is healthy                             | yes                    | ✓ |
| On most days I feel                                      | sad                    | ✓ |
| I drink alcohol                                          | more than twice a week | ▲ |
|                                                          |                        | ▲ |
| <input checked="" type="checkbox"/> What to expect       | I accept               |   |
| <input checked="" type="checkbox"/> I am                 | female                 |   |
| <input checked="" type="checkbox"/> My age is            | 25                     |   |

## Report Alerts

Employing flags is an excellent way to quickly capture the most important information from your patient's response.

Catch red alerts, green protective factors and orange highlights right at the top of your surveys - our system highlights them automatically for you.

TickiT Health Professional Logged in as Stephanie Logout

NAT Neurology Reports Help Feedback Settings

Reports / All

| Patient ID           | Age | Gender     | Time ↓              | Survey | Alert | Action                                                                                                                                                                                                                                                            |
|----------------------|-----|------------|---------------------|--------|-------|-------------------------------------------------------------------------------------------------------------------------------------------------------------------------------------------------------------------------------------------------------------------|
| <a href="#">6543</a> | 18  | female     | 04/17/2013 at 11:59 | HEADSS | 1     |          |
| <a href="#">9876</a> | 17  | male       | 04/17/2013 at 10:07 | HEADSS | 4     |          |
| <a href="#">7890</a> | 16  | female     | 04/17/2013 at 10:02 | HEADSS | 1     |          |
| <a href="#">4567</a> | 22  | Male       | 04/17/2013 at 09:59 | TOOTH  |       |          |
| <a href="#">1234</a> | 14  | unanswered | 04/17/2013 at 09:57 | TOOTH  |       |    |
| <a href="#">0394</a> | 17  | male       | 04/17/2013 at 10:07 | HEADSS | 2     |    |
| <a href="#">4637</a> | 16  | female     | 04/17/2013 at 10:02 | HEADSS |       |    |
| <a href="#">3321</a> | 15  | Male       | 04/17/2013 at 09:59 | TOOTH  |       |    |
| <a href="#">0933</a> | 25  | Male       | 04/17/2013 at 09:57 | TOOTH  |       |    |

## Reviewing Reports

TickiT offers various report views and export functions:

### Website

Quickly review reports from your personal TickiT website.

### PDF

Export PDFs to print for paper charts or export for EMR's.

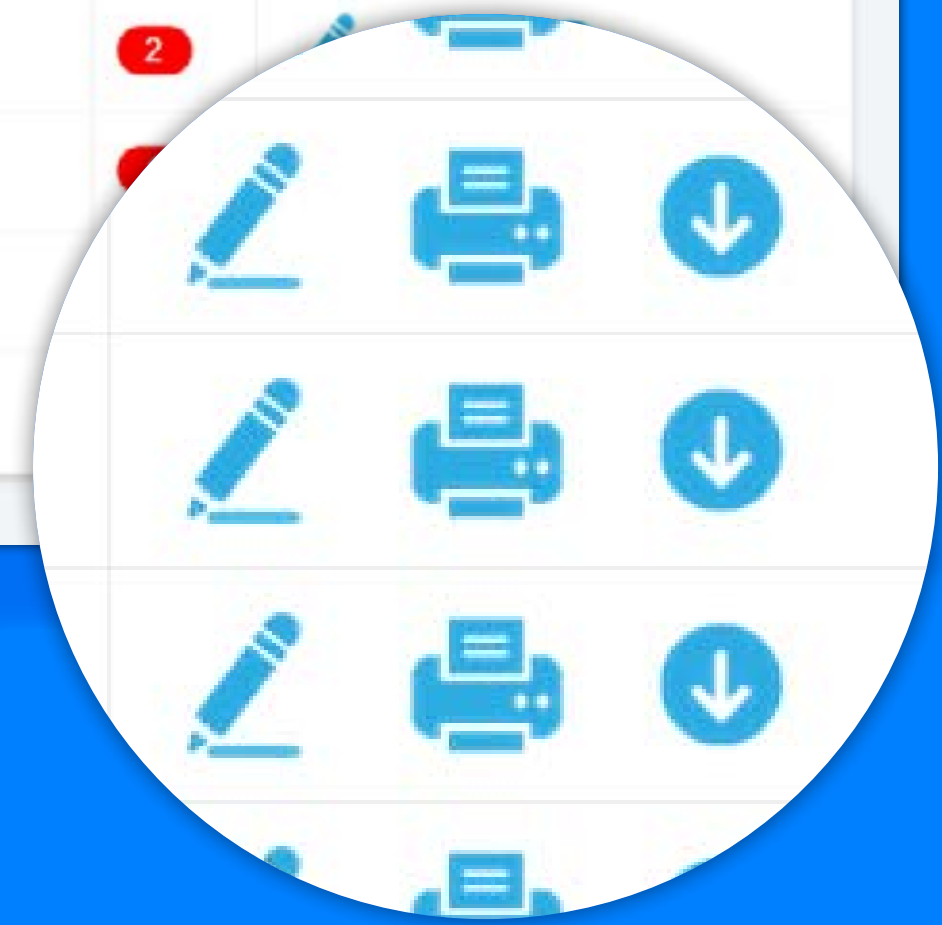

TickiT Health Professional | Logged in as Stephanie | Logout

NA Neurology Reports | Help | Feedback | Settings

### Settings / Select Export Range

**Exporting Data from NA Neurology**

Select the time period for which you would like to export data. Dates are inclusive. The export will be queued and will appear on this page when it has completed.

Survey:  ?

Start date:    ?

End date:    ?

[Generate Export](#)

**Previous Exports**

Exports are available for download for a period of one month.

| Survey | Date Range                   | Date Requested         |                          |
|--------|------------------------------|------------------------|--------------------------|
| HEADSS | Jan 28, 2012 to May 28, 2013 | May 28, 2013 at 7:03pm | <a href="#">Download</a> |

| Patient ID | Welcome: What to expect | I am   |
|------------|-------------------------|--------|
| 9092       | I accept                | female |
| 8085       | I accept                | male   |
| 8456       | I accept                | male   |
| 3121       | I accept                | male   |
| 7073       | I accept                | female |
| 4583       | I accept                | male   |
| 7474       | I accept                | male   |
| 5054       | I accept                | male   |
| 1231       | I accept                | male   |
| 5352       | I accept                | female |
| 6453       | I accept                | female |
| 274        | I accept                | female |
|            | I accept                | female |

## CSV Export for Research

This feature is a researchers' dream, export automatically aggregated reports between the dates of your choosing. No need for secondary data entry, with a couple of clicks you'll have all your data sorted for you in plain text or binary CSV formats.

# TickiT Services

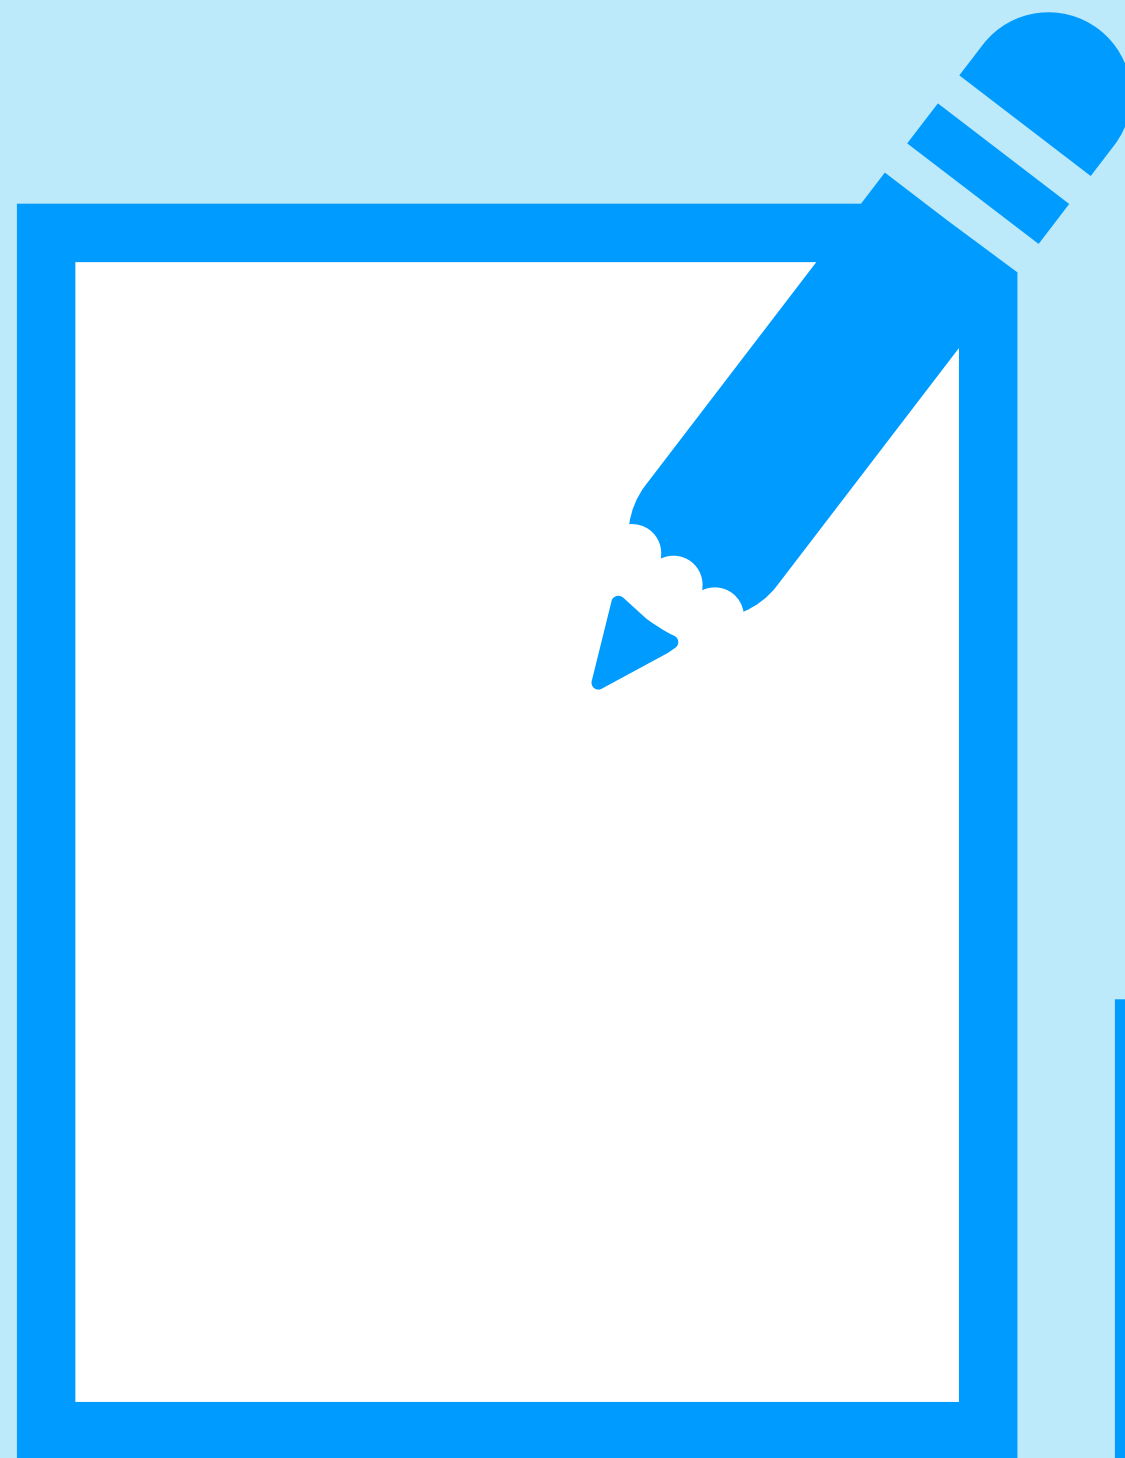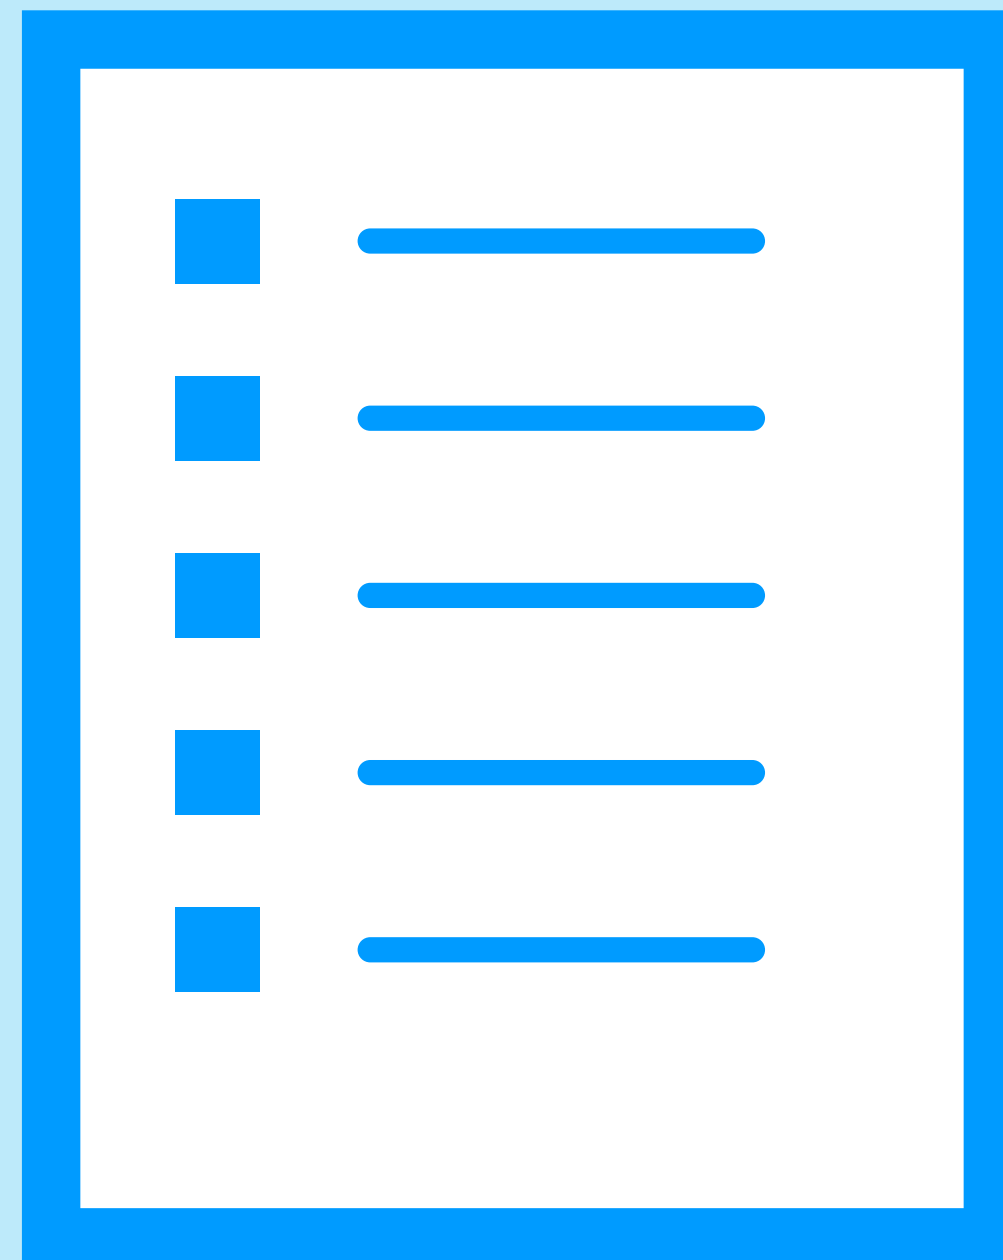

## Create Custom Surveys or Choose Off the Rack

### Custom Surveys

Have specific needs for your clinic or research project? We'll build you a custom survey with full interactivity. Our team also specializes in editing for low/wide literacy rates and patient friendly prose.

### Validated Off the Rack Surveys

TickiT has a library of validated surveys written by other health professionals, simply sign up and get started collecting valuable patient data.

# Security & Tech Specs

## Security

We've done all our homework, with TickiT rest assured knowing your data is secure. We meet Canadian and American ePHI requirements and are HIPPA compliant.

## Tech Specs

- + Available for iPad & Nexus 7 devices
- + iPads are available for lease, inquire for further details

## 🔒 TickiT Security Specs 🔒

**TickiT meets eHealth standards including:**

- A. Encrypted data transmission**
- B. Password protected data**
- C. Secure data storage on dedicated servers**
- D. Secure backup**
- E. Patient consent**
- F. Unlimited users with role based access**
- G. End user agreement**
- H. Audit log for monitoring**
- I. Limited patient identifiers: no name or DOB on the questionnaire**
- J. Company Privacy Impact Assessment available on request**

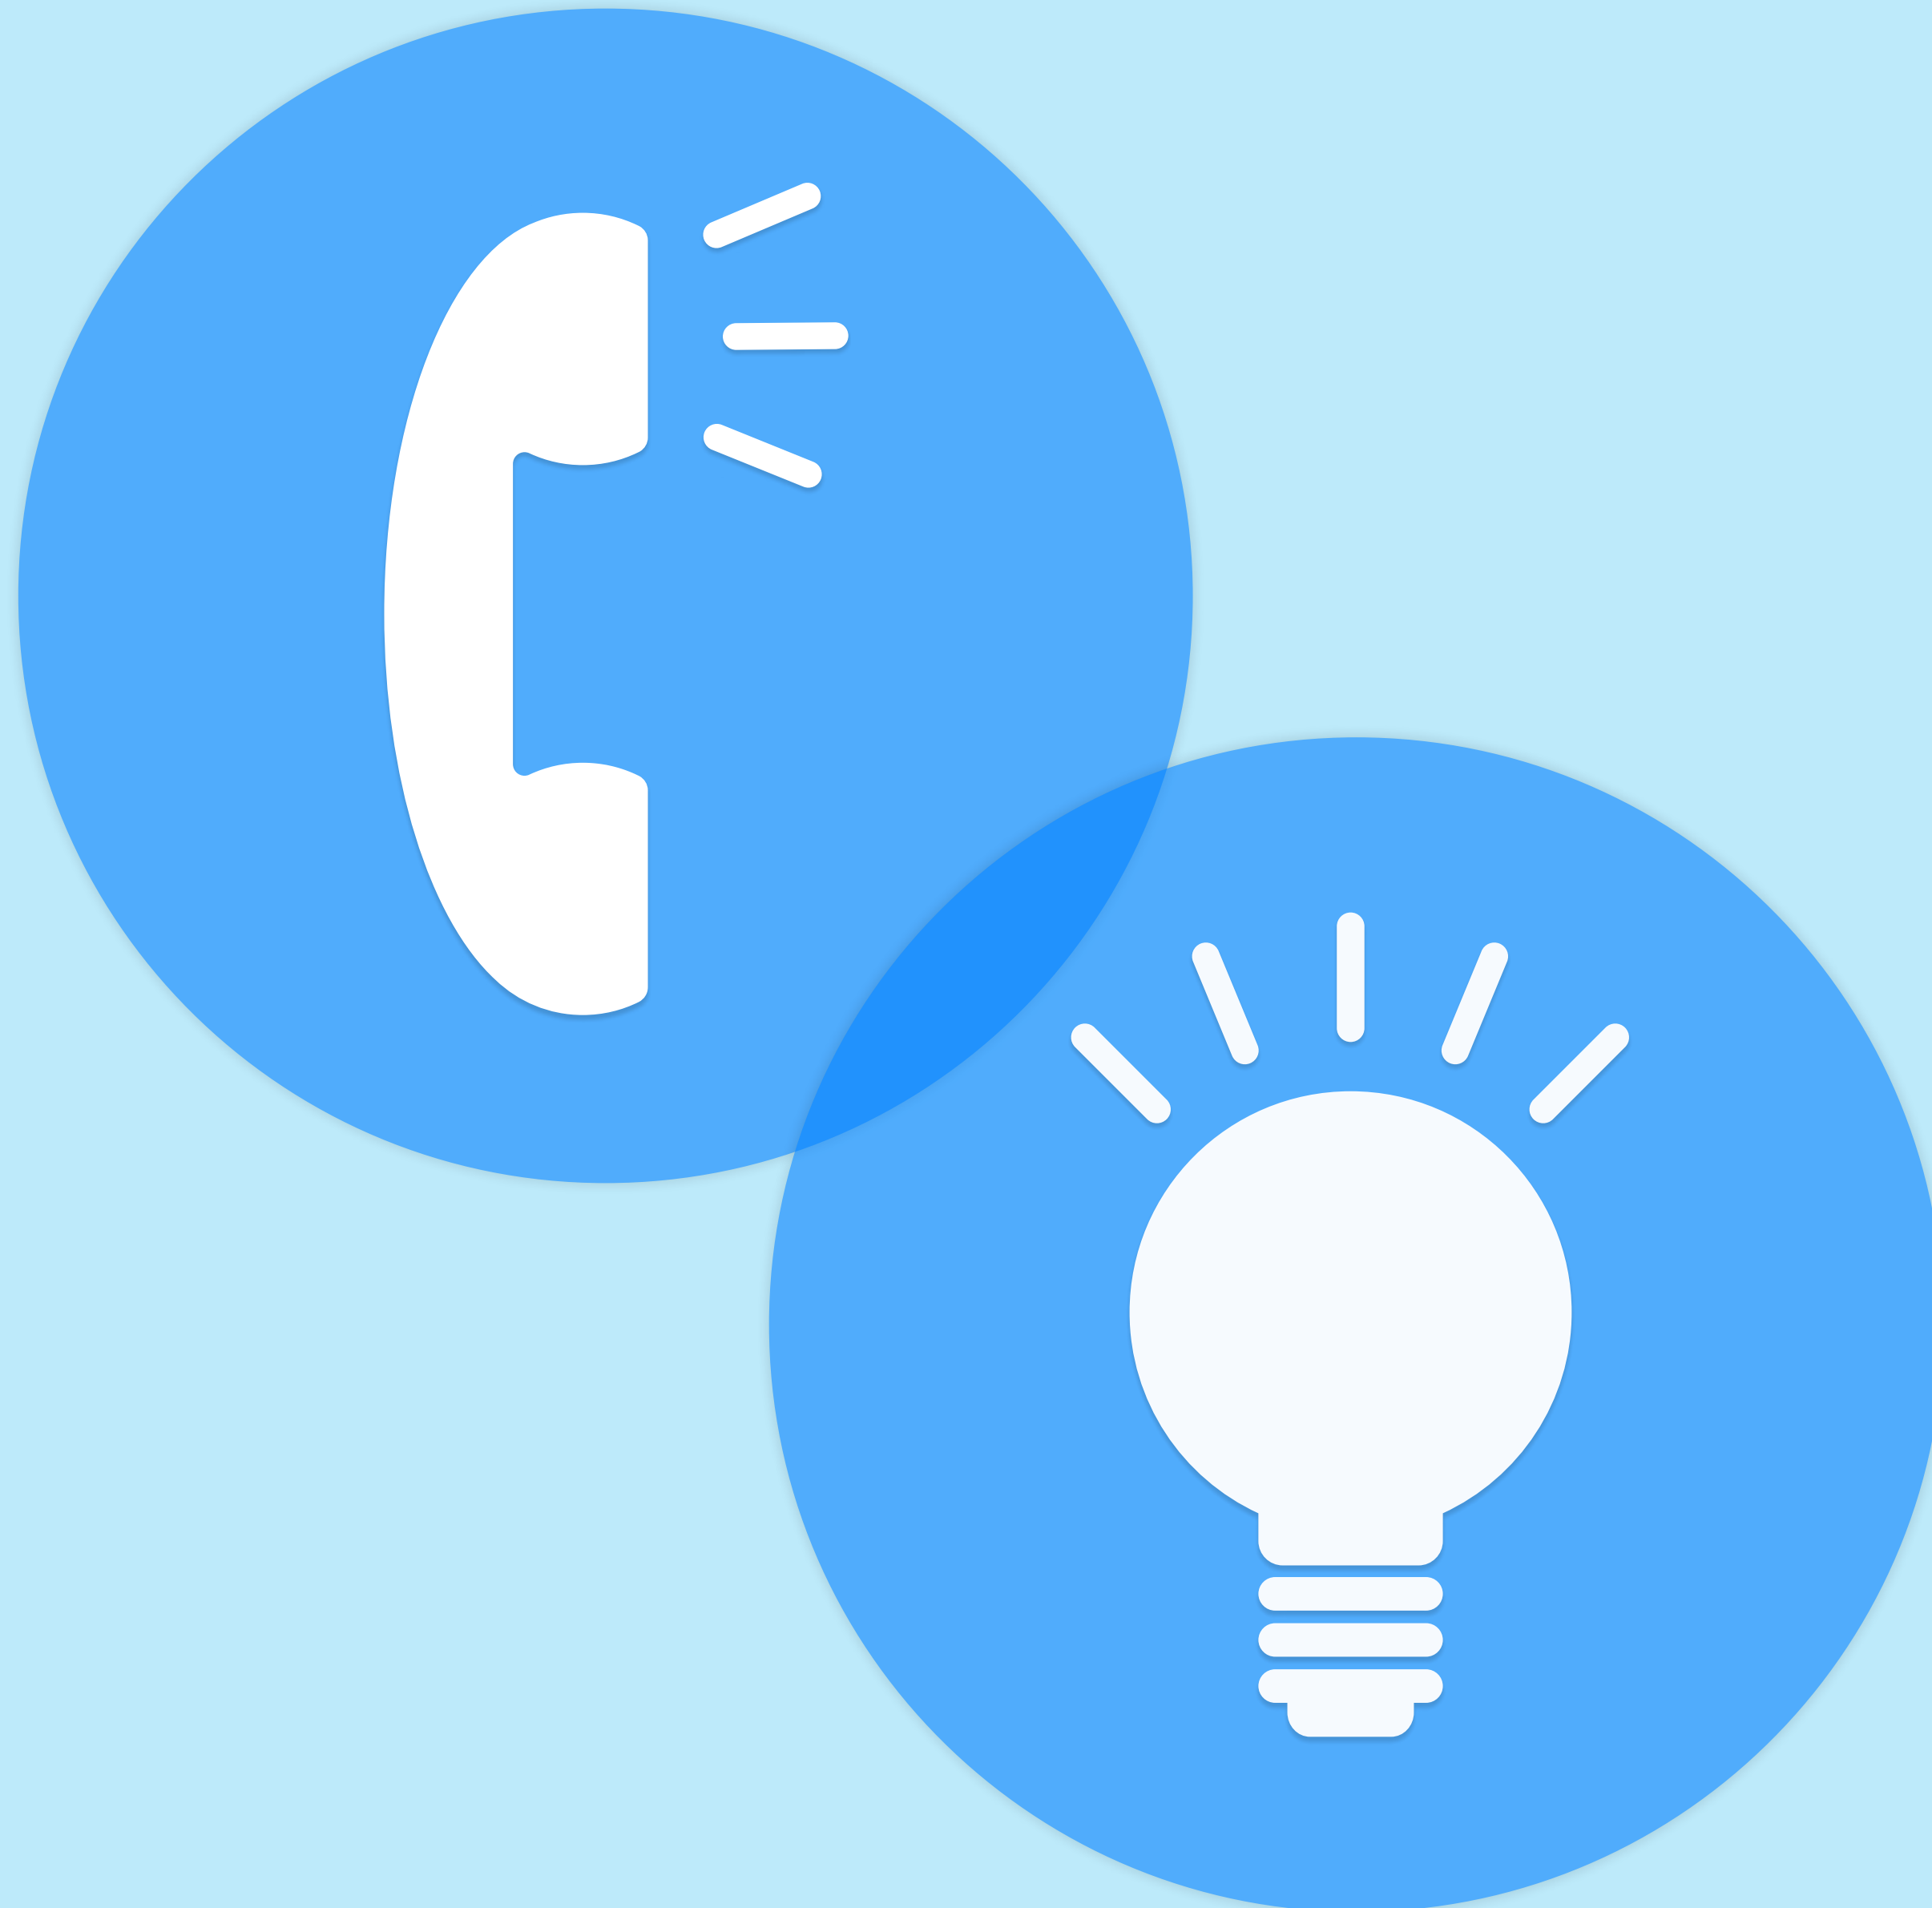

## Unlimited Tech Support & Suggestions Box

As a TickiT customer your opinion matters, if you have an idea for a useful new feature, or think something could be improved to aid your workflow - let us know! Expect follow up calls and the chance to share your thoughts.



**Contact us to discuss how TickiT can work for you.**

[info@tickitforhealth.com](mailto:info@tickitforhealth.com)

[www.tickitforhealth.com](http://www.tickitforhealth.com)

**TickiT**
